# Supplementary material
Source: Springer Nature journal article supplement (http://www.springermedizin.de/resource/supplementary/12955_2009_585_MOESM1_ESM.pdf/9560762)

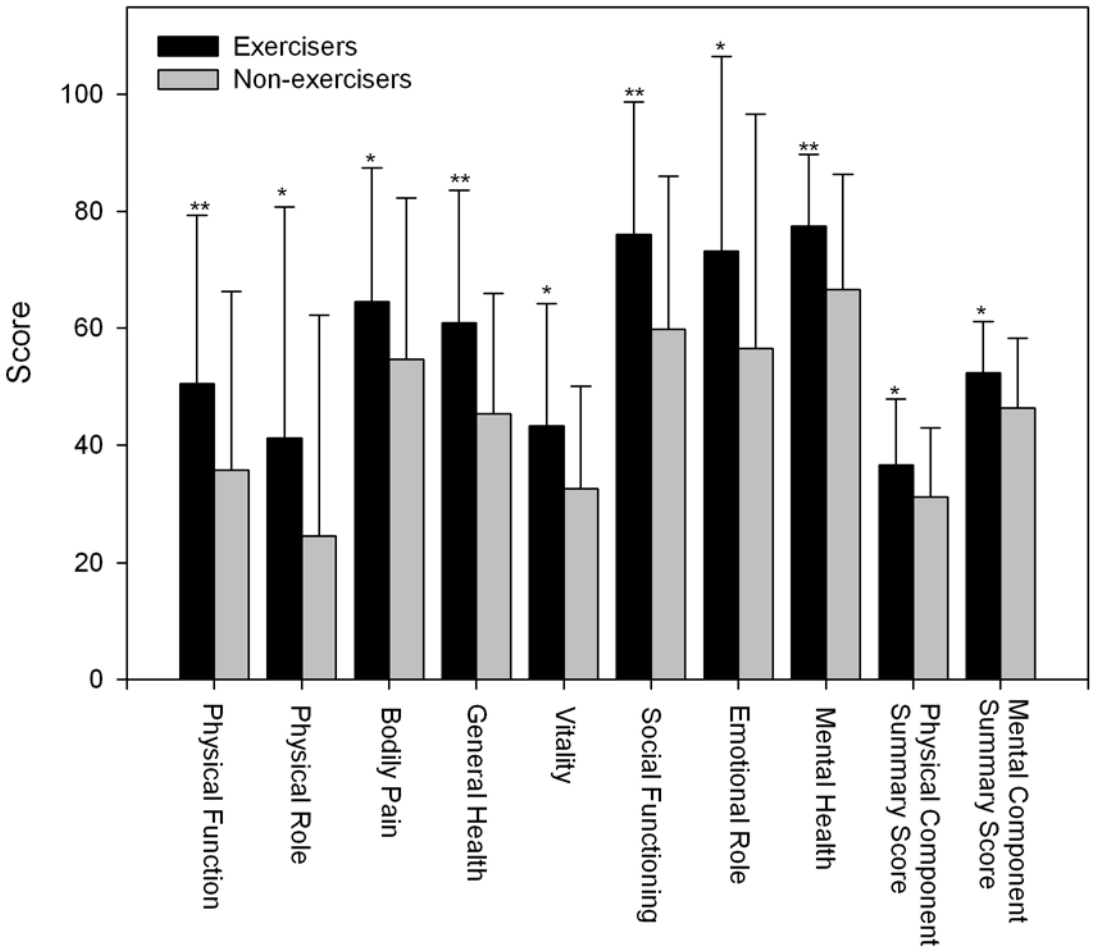

Health Status Questionnaire Short Form 36 Component

Supplement: MOESM1 [file 9560762]
